# Supplementary material for: Geochemical Characterization of Laminated Crystalline Crust Travertines Formed by Ca2+-Deficient Hot Springs at Sobcha (China)
Source: MDPI journal article supplement (doi:10.3390/min13020220), 2023-02-02
Supplement: s1 [file s1]

**Table S1.**  $\delta^{13}\text{C}$ ,  $\delta^{18}\text{O}$ , and  $^{87}\text{Sr}/^{86}\text{Sr}$  values of the Sobcha travertines and their calculated  $\delta^{13}\text{C}_{\text{mother-CO}_2}$  (i.e.,  $\delta^{13}\text{C}$  of mother  $\text{CO}_2$ ).  $\delta^{13}\text{C}_{\text{mother-CO}_2}$  was evaluated using the equation from Panichi and Tongiorgi [84].

| Sample ID | $\delta^{13}\text{C}$<br>(V-PDB ‰) | $\delta^{18}\text{O}$<br>(V-PDB ‰) | $^{87}\text{Sr}/^{86}\text{Sr}$ | $\delta^{13}\text{C}_{\text{mother-CO}_2}$ |
|-----------|------------------------------------|------------------------------------|---------------------------------|--------------------------------------------|
| 1         | 3.9                                | −26.5                              | 0.712752                        | −5.8                                       |
| 2         | 3.9                                | −26.6                              | 0.712876                        | −5.8                                       |
| 3         | 3.9                                | −26.6                              | 0.712686                        | −5.8                                       |
| 4         | 3.8                                | −26.4                              | 0.712812                        | −5.9                                       |
| 5         | 3.8                                | −26.7                              | 0.712717                        | −5.9                                       |
| 6         | 4.0                                | −26.0                              | 0.712714                        | −5.7                                       |
| 7         | 4.0                                | −26.3                              | 0.712759                        | −5.7                                       |
| 8         | 3.8                                | −26.6                              | 0.712859                        | −6.0                                       |
| 9         | 3.9                                | −26.2                              | 0.712813                        | −5.8                                       |
| 10        | 3.9                                | −26.7                              | 0.712824                        | −5.8                                       |
| 11        | 3.8                                | −26.3                              | 0.712784                        | −6.0                                       |
| 12        | 4.5                                | −23.8                              | 0.712696                        | −5.1                                       |
| 13        | 4.0                                | −25.8                              | 0.712951                        | −5.7                                       |
| 14        | 3.7                                | −26.3                              | 0.712823                        | −6.1                                       |
| 15        | 3.8                                | −25.8                              | 0.712783                        | −5.9                                       |
| 16        | 4.3                                | −25.3                              | 0.712662                        | −5.4                                       |
| 17        | 4.1                                | −26.0                              | 0.712649                        | −5.6                                       |
| 18        | 4.0                                | −26.1                              | 0.712610                        | −5.8                                       |
| 19        | 4.9                                | −23.7                              | 0.712737                        | −4.6                                       |
| 20        | 4.3                                | −25.0                              | 0.712712                        | −5.4                                       |
| 21        | 4.5                                | −23.7                              | 0.712458                        | −5.1                                       |
| 22        | 4.1                                | −25.1                              | 0.712733                        | −5.6                                       |

|    |     |       |          |      |
|----|-----|-------|----------|------|
| 23 | 4.3 | −24.4 | 0.712707 | −5.4 |
| 24 | 4.1 | −25.3 | 0.712825 | −5.5 |
| 25 | 4.0 | −25.3 | 0.712708 | −5.7 |
| 26 | 4.0 | −25.1 | 0.712769 | −5.7 |
| 27 | 4.0 | −25.3 | 0.712646 | −5.7 |
| 28 | 4.3 | −24.1 | 0.712643 | −5.3 |
| 29 | 3.4 | −25.1 | 0.712732 | −6.5 |
| 30 | 3.7 | −24.9 | 0.712677 | −6.0 |

**Table S2.** U-Th dating results of the Sobcha travertines.

| Sample ID | <sup>238</sup> U (ppb) | <sup>232</sup> Th (ppt) | <sup>230</sup> Th/ <sup>232</sup> Th (atomic ratio 10 <sup>−6</sup> ) | δ <sup>234</sup> U* (measured) | <sup>230</sup> Th/ <sup>238</sup> U (activity ratio) | <sup>230</sup> Th age (yr) (uncorrected) | <sup>230</sup> Th age (yr) (corrected) | δ <sup>234</sup> U <sub>initial</sub> ** (corrected) | <sup>230</sup> Th age (yr BP)*** (corrected) |
|-----------|------------------------|-------------------------|-----------------------------------------------------------------------|--------------------------------|------------------------------------------------------|------------------------------------------|----------------------------------------|------------------------------------------------------|----------------------------------------------|
| 1         | 331.8 ±0.5             | 12576 ±252              | 68.1 ±1.4                                                             | 847.4 ±2.4                     | 0.1566 ±0.0004                                       | 9594 ±30                                 | 9003 ±420                              | 869 ±3                                               | 8981 ±420                                    |
| 21        | 729.1 ±1.6             | 100135 ±2013            | 17.0 ±0.3                                                             | 837.4 ±3.0                     | 0.1417 ±0.0005                                       | 8699 ±35                                 | 6524 ±1542                             | 853 ±5                                               | 6502 ±1542                                   |
| 30        | 403.2 ±0.6             | 23009 ±461              | 17.0 ±0.3                                                             | 833.8 ±2.5                     | 0.0452 ±0.0003                                       | 2714 ±16                                 | 1807 ±642                              | 838 ±3                                               | 1785 ±642                                    |

\* $\delta^{234}\text{U} = ([^{234}\text{U}/^{238}\text{U}]_{\text{activity}} - 1) \cdot 1000$ .

\*\* $\delta^{234}\text{U}_{\text{initial}} = \delta^{234}\text{U}_{\text{measured}} \cdot e^{\lambda^{234}T}$ .

\*\*\*B.P. stands for "Before Present", "Present" is 2000 A.D.

The initial <sup>230</sup>Th/<sup>232</sup>Th atomic ratio are corrected with a crustal average of 4.4, the range of change is 50%, i.e.  $4.4 \pm 2.2 \cdot 10^{-6}$ .

**Table S3.** Concentrations ( $\mu\text{g g}^{-1}$ ) of trace elements in the travertine samples from Sobcha.

| Sample ID | Mn   | Sr  | Zr   | Cu   | La    | Ce   | Pr    | Nd    | Sm    | Eu    | Gd    | Tb    | Dy    | Ho    | Er    | Tm     | Yb    | Lu     | $\Sigma\text{REE}$ |
|-----------|------|-----|------|------|-------|------|-------|-------|-------|-------|-------|-------|-------|-------|-------|--------|-------|--------|--------------------|
| 1         | 675  | 531 | 1.14 | 0.28 | 0.3   | 0.64 | 0.11  | 0.56  | 0.25  | 0.088 | 0.43  | 0.081 | 0.52  | 0.11  | 0.33  | 0.046  | 0.27  | 0.041  | 3.78               |
| 2         | 656  | 604 | 2.46 | 0.55 | 0.83  | 1.74 | 0.23  | 0.97  | 0.33  | 0.11  | 0.49  | 0.093 | 0.59  | 0.13  | 0.37  | 0.052  | 0.3   | 0.046  | 6.28               |
| 3         | 1660 | 572 | 3.00 | 0.49 | 1.58  | 3.56 | 0.66  | 3.38  | 1.52  | 0.54  | 2.74  | 0.53  | 3.38  | 0.74  | 2.12  | 0.29   | 1.75  | 0.26   | 23.05              |
| 4         | 528  | 634 | 0.66 | 0.25 | 0.057 | 0.12 | 0.018 | 0.087 | 0.048 | 0.016 | 0.06  | 0.012 | 0.076 | 0.015 | 0.048 | 0.0078 | 0.038 | 0.0062 | 0.61               |
| 5         | 1270 | 570 | 1.79 | 0.51 | 0.9   | 2    | 0.39  | 2.01  | 0.9   | 0.32  | 1.63  | 0.31  | 1.96  | 0.42  | 1.21  | 0.16   | 0.99  | 0.15   | 13.35              |
| 7         | 1090 | 526 | 1.47 | 0.25 | 0.57  | 1.25 | 0.24  | 1.22  | 0.55  | 0.2   | 0.99  | 0.19  | 1.21  | 0.26  | 0.74  | 0.1    | 0.6   | 0.091  | 8.21               |
| 8         | 688  | 511 | 1.11 | 0.31 | 0.56  | 1.18 | 0.2   | 0.97  | 0.42  | 0.15  | 0.69  | 0.13  | 0.83  | 0.18  | 0.51  | 0.071  | 0.42  | 0.061  | 6.37               |
| 9         | 1140 | 546 | 2.00 | 0.5  | 1.18  | 2.56 | 0.46  | 2.33  | 1.02  | 0.36  | 1.77  | 0.33  | 2.09  | 0.45  | 1.28  | 0.18   | 1.04  | 0.15   | 15.20              |
| 10        | 1280 | 543 | 1.96 | 0.27 | 0.83  | 1.81 | 0.33  | 1.63  | 0.75  | 0.26  | 1.27  | 0.24  | 1.53  | 0.33  | 0.94  | 0.13   | 0.77  | 0.11   | 10.93              |
| 14        | 1220 | 556 | 1.53 | 0.19 | 0.84  | 1.85 | 0.36  | 1.86  | 0.83  | 0.3   | 1.5   | 0.28  | 1.81  | 0.39  | 1.11  | 0.15   | 0.9   | 0.14   | 12.32              |
| 15        | 811  | 521 | 0.83 | 0.19 | 0.41  | 0.88 | 0.16  | 0.85  | 0.38  | 0.14  | 0.66  | 0.12  | 0.78  | 0.16  | 0.47  | 0.065  | 0.39  | 0.055  | 5.52               |
| 17        | 726  | 573 | 2.39 | 0.55 | 0.88  | 1.86 | 0.26  | 1.1   | 0.4   | 0.13  | 0.62  | 0.12  | 0.71  | 0.15  | 0.44  | 0.061  | 0.36  | 0.053  | 7.14               |
| 18        | 804  | 516 | 3.24 | 0.96 | 1.35  | 2.8  | 0.39  | 1.64  | 0.59  | 0.19  | 0.9   | 0.17  | 1.05  | 0.23  | 0.65  | 0.089  | 0.52  | 0.079  | 10.65              |
| 19        | 362  | 394 | 3.22 | 0.62 | 0.81  | 1.67 | 0.19  | 0.67  | 0.17  | 0.038 | 0.17  | 0.03  | 0.18  | 0.039 | 0.11  | 0.017  | 0.099 | 0.015  | 4.21               |
| 20        | 279  | 399 | 0.59 | 0.2  | 0.14  | 0.29 | 0.035 | 0.14  | 0.056 | 0.017 | 0.072 | 0.012 | 0.079 | 0.016 | 0.047 | 0.0086 | 0.037 | 0.0062 | 0.96               |
| 22        | 292  | 552 | 0.38 | 0.75 | 0.08  | 0.17 | 0.023 | 0.13  | 0.056 | 0.025 | 0.091 | 0.019 | 0.12  | 0.024 | 0.07  | 0.012  | 0.057 | 0.011  | 0.89               |
| 23        | 440  | 326 | 0.59 | 0.66 | 0.22  | 0.47 | 0.082 | 0.43  | 0.19  | 0.071 | 0.33  | 0.061 | 0.4   | 0.085 | 0.24  | 0.035  | 0.2   | 0.031  | 2.85               |
| 24        | 524  | 381 | 0.70 | 0.77 | 0.29  | 0.6  | 0.099 | 0.51  | 0.21  | 0.078 | 0.36  | 0.069 | 0.44  | 0.094 | 0.26  | 0.039  | 0.23  | 0.035  | 3.31               |
| 26        | 1010 | 408 | 2.40 | 0.96 | 1.16  | 2.39 | 0.39  | 1.83  | 0.76  | 0.26  | 1.26  | 0.23  | 1.5   | 0.33  | 0.94  | 0.13   | 0.76  | 0.12   | 12.06              |
| 29        | 1060 | 433 | 3.13 | 1.17 | 1.43  | 2.91 | 0.46  | 2.05  | 0.78  | 0.27  | 1.25  | 0.23  | 1.47  | 0.31  | 0.91  | 0.12   | 0.74  | 0.11   | 13.04              |
| PAAS*     |      |     |      |      | 38    | 80   | 8.9   | 32    | 5.6   | 1.1   | 4.7   | 0.77  | 4.4   | 1     | 2.9   | 0.4    | 2.8   | 0.43   |                    |

\*PAAS = Post-Archean Australian Shale [76]

**Table S4.** Mn/Sr, enrichment indexes, and elemental anomalies of the studied travertines from Sobcha.

| Sample ID | Mn/Sr | (Pr/Yb) <sub>N</sub> | (Pr/Tb) <sub>N</sub> | (Tb/Yb) <sub>N</sub> | (Eu/Eu*) <sub>N</sub> |
|-----------|-------|----------------------|----------------------|----------------------|-----------------------|
| 1         | 1.27  | 0.13                 | 0.12                 | 1.09                 | 1.35                  |
| 2         | 1.09  | 0.24                 | 0.21                 | 1.13                 | 1.34                  |
| 3         | 2.90  | 0.12                 | 0.11                 | 1.10                 | 1.33                  |
| 4         | 0.83  | 0.15                 | 0.13                 | 1.15                 | 1.39                  |
| 5         | 2.23  | 0.12                 | 0.11                 | 1.14                 | 1.33                  |
| 7         | 2.07  | 0.13                 | 0.11                 | 1.15                 | 1.36                  |
| 8         | 1.35  | 0.15                 | 0.13                 | 1.13                 | 1.39                  |
| 9         | 2.09  | 0.14                 | 0.12                 | 1.15                 | 1.35                  |
| 10        | 2.36  | 0.13                 | 0.12                 | 1.13                 | 1.33                  |
| 14        | 2.19  | 0.13                 | 0.11                 | 1.13                 | 1.36                  |
| 15        | 1.56  | 0.13                 | 0.12                 | 1.12                 | 1.42                  |
| 17        | 1.27  | 0.23                 | 0.19                 | 1.21                 | 1.28                  |
| 18        | 1.56  | 0.24                 | 0.20                 | 1.19                 | 1.28                  |
| 19        | 0.92  | 0.60                 | 0.55                 | 1.10                 | 1.05                  |
| 20        | 0.70  | 0.30                 | 0.25                 | 1.18                 | 1.33                  |
| 22        | 0.53  | 0.13                 | 0.10                 | 1.21                 | 1.68                  |
| 23        | 1.35  | 0.13                 | 0.12                 | 1.11                 | 1.43                  |
| 24        | 1.38  | 0.14                 | 0.12                 | 1.09                 | 1.41                  |
| 26        | 2.48  | 0.16                 | 0.15                 | 1.10                 | 1.34                  |
| 29        | 2.45  | 0.20                 | 0.17                 | 1.13                 | 1.37                  |
| average   | 1.63  | 0.19                 | 0.16                 | 1.14                 | 1.36                  |
